# Supplementary material
Source: PubMed Central journal article supplement (PMC3730768)

# Clone 24 [0.54 $\mu$ g/ml]

A $\beta$ : 1-7 3-9 pE3-9 3-13 1-15 3-40 pE3-40 1-40 BSA PBS

1000ng

100

10

1

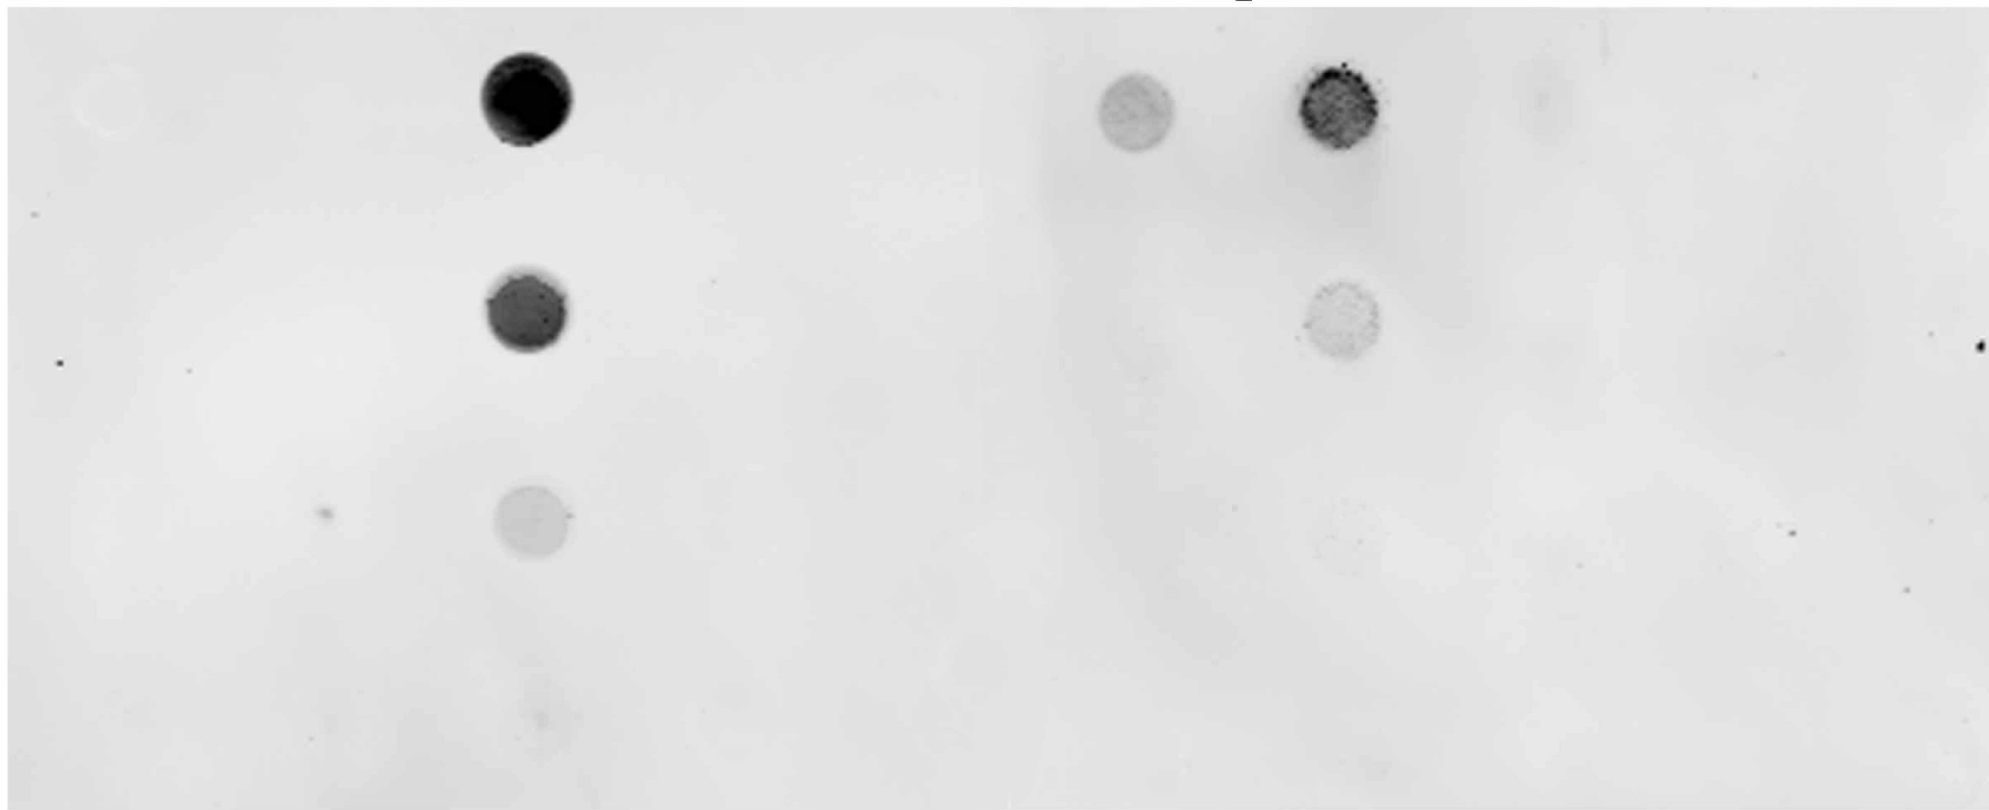

Supplement: mmc1.pdf [file mmc1.pdf]
