# Supplementary material
Source: PubMed Central journal article supplement (PMC3730768)

AD

caribbean vervet

beagle canine

APP<sup>swe</sup>/PS1 $\Delta$ E9

82E1

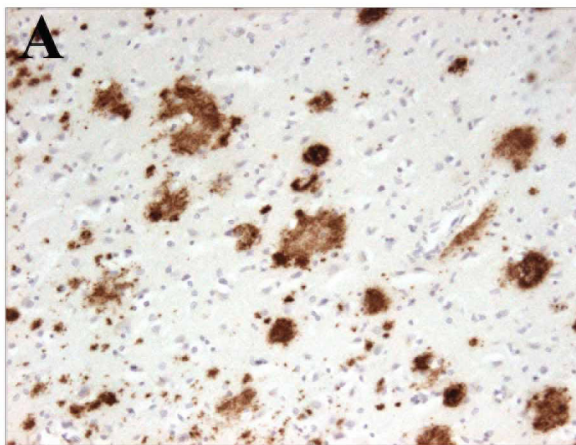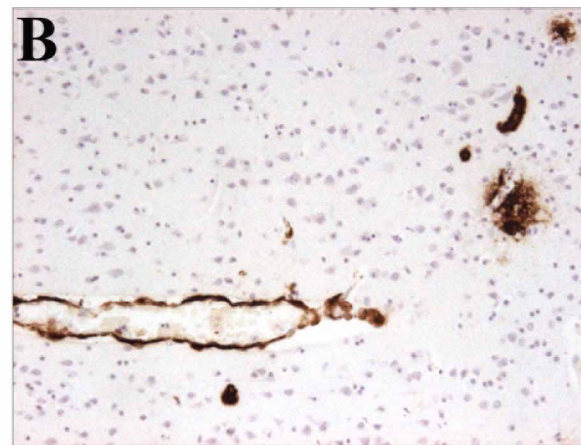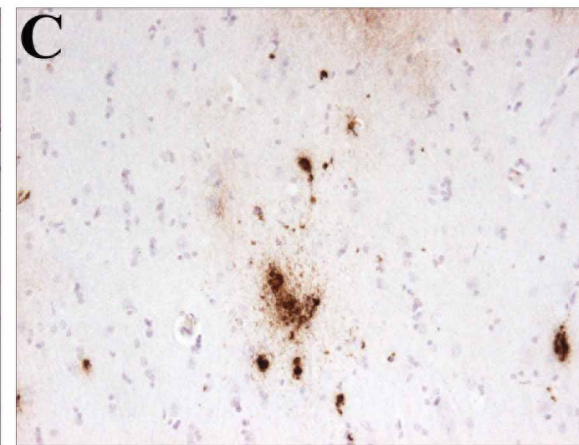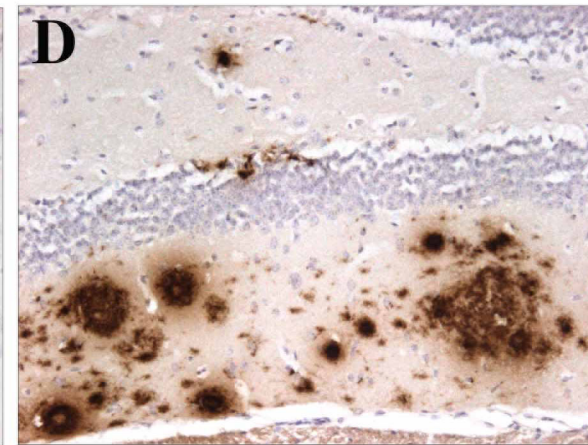

clone 24

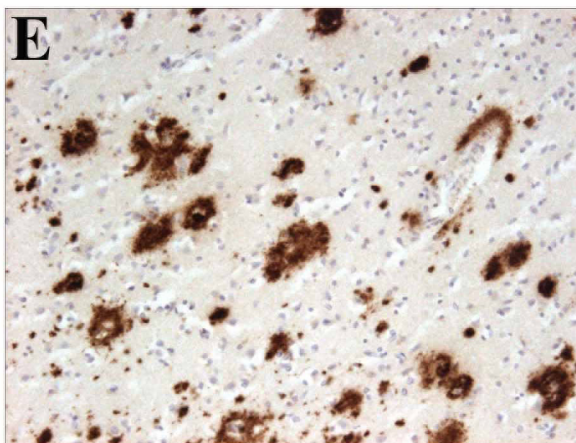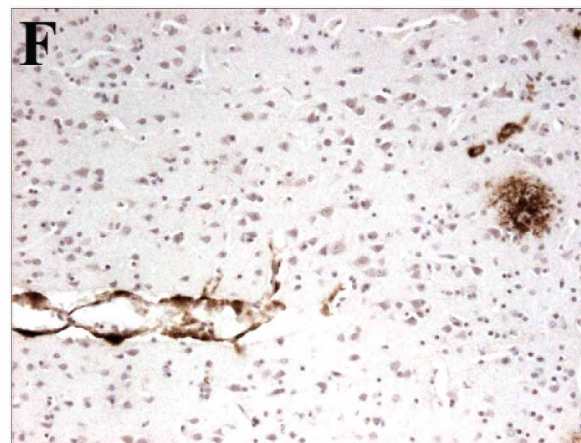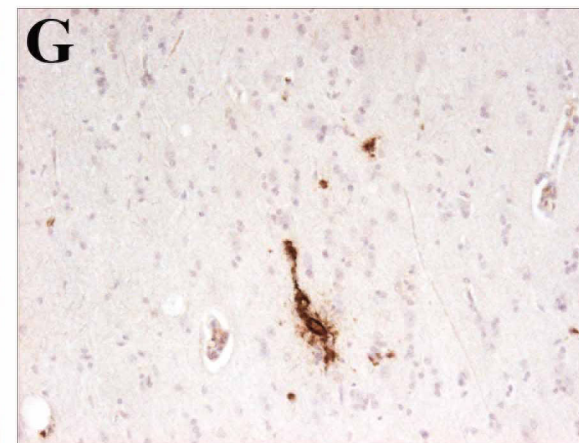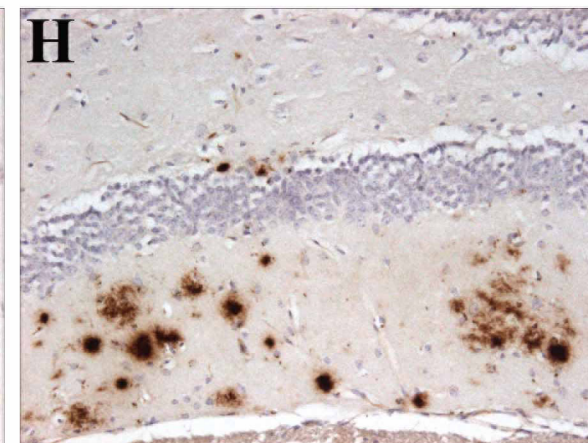clone 24  
adsorbed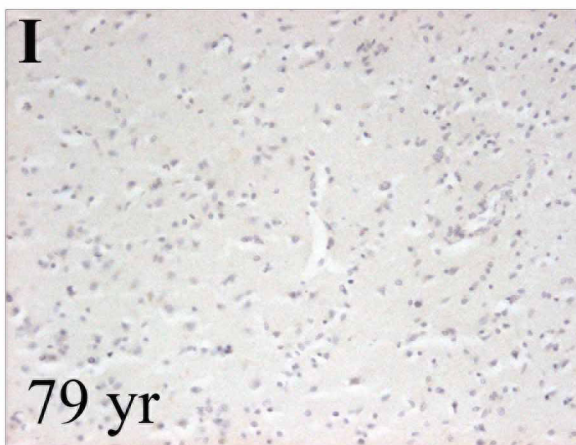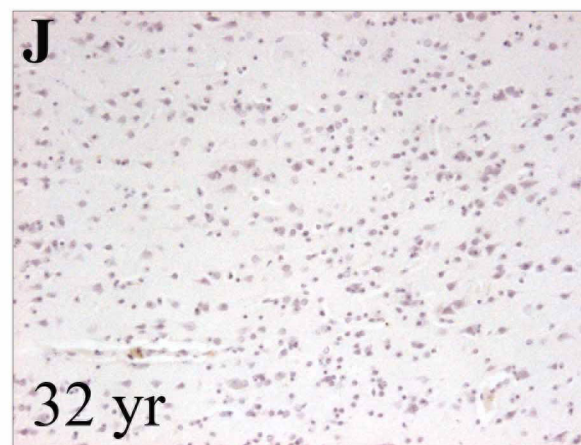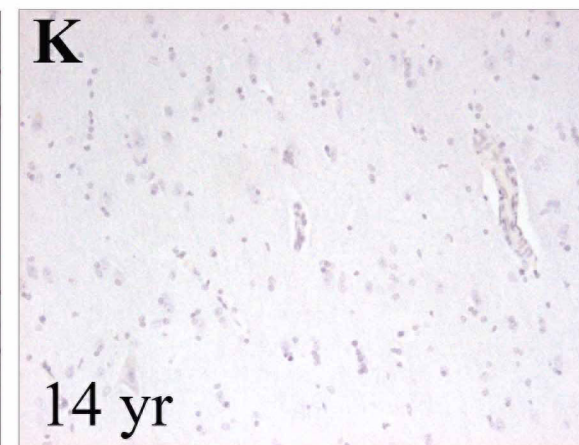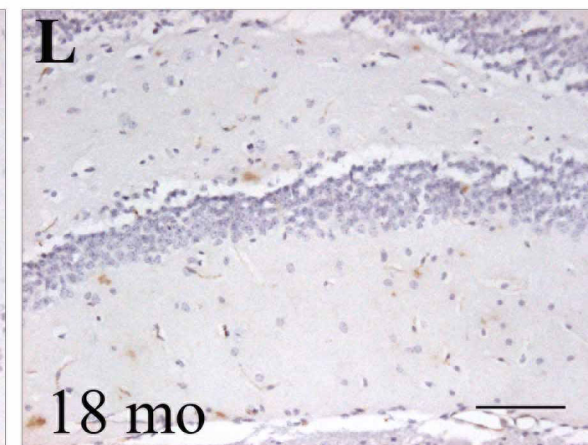

Supplement: mmc2.pdf [file mmc2.pdf]
