# Supplementary material
Source: PubMed Central journal article supplement (PMC3730768)
Supplement: mmc3.pdf [file mmc3.pdf]

general A $\beta$

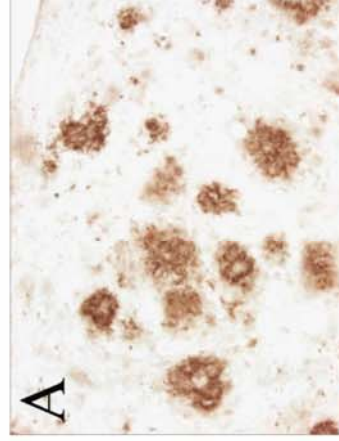

mThy-1-  
hAPP751

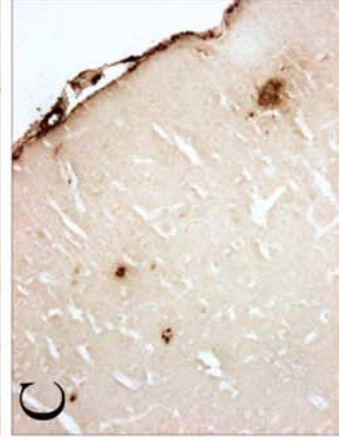

Tg2576

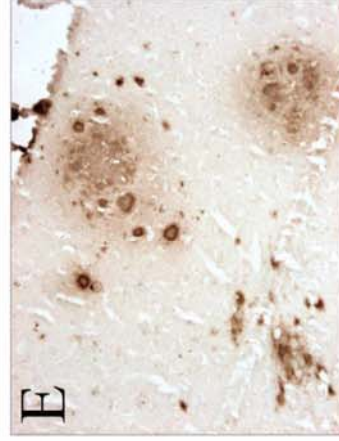

Tg2576/CCL2<sup>+/+</sup>

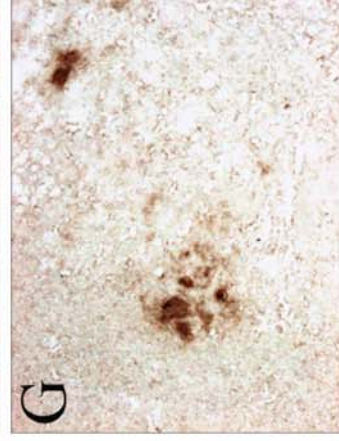

TgCRND8

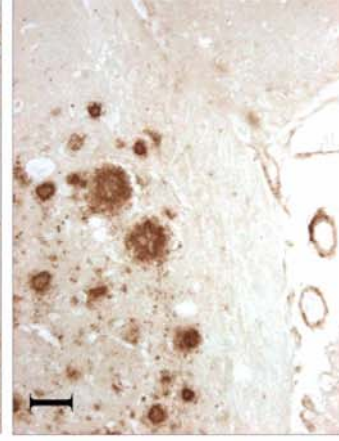

3xTg-AD

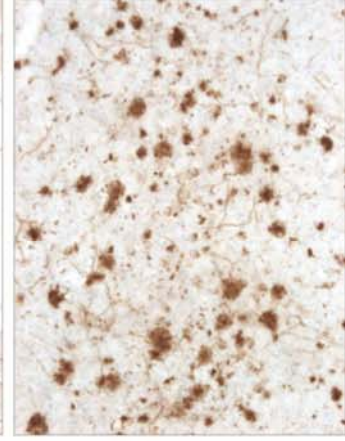

5XFAD

pyroGlu-3A $\beta$

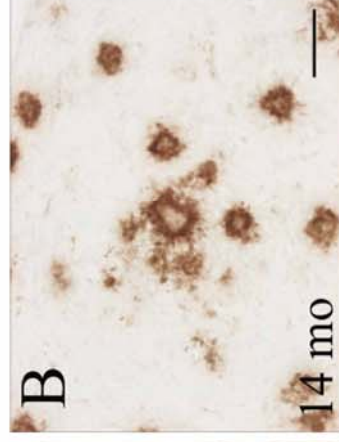

14 mo

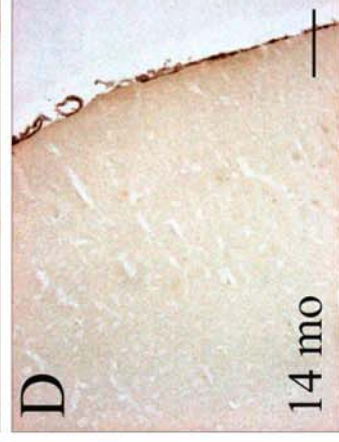

14 mo

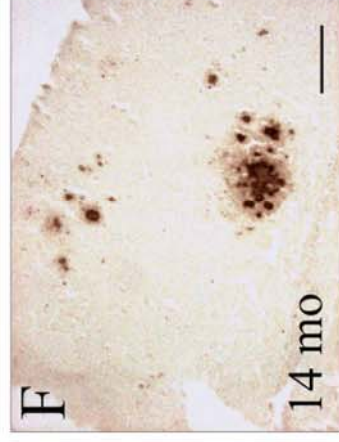

14 mo

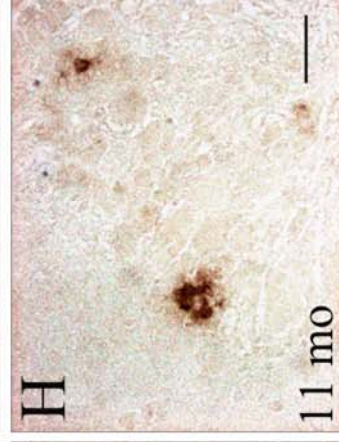

11 mo

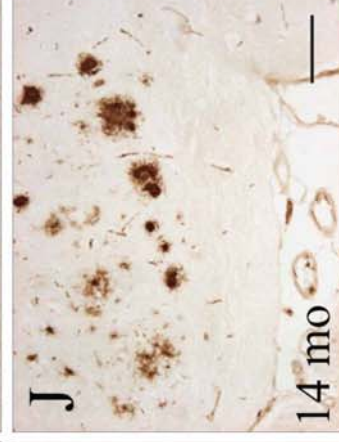

14 mo

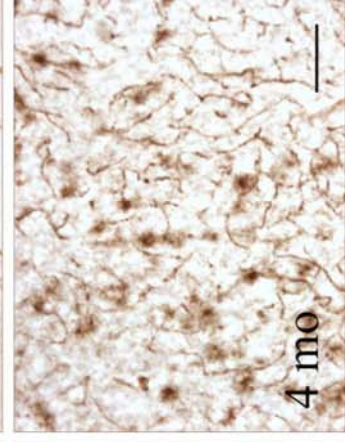

4 mo
