# Supplementary material
Source: PubMed Central journal article supplement (PMC3730768)

J20 B6D2F1

J20 C57BL/6

J20;C3<sup>-/-</sup>

general A $\beta$

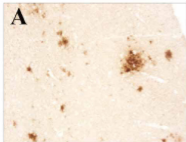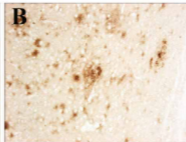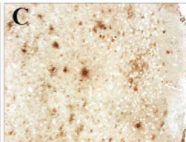

pyroGlu-3 A $\beta$

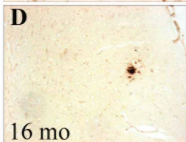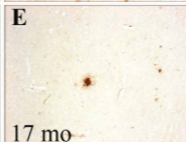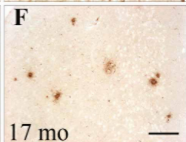

Supplement: mmc4.pdf [file mmc4.pdf]
