# Supplementary material
Source: PubMed Central journal article supplement (PMC3730768)

# PSAPP-18 months

general A $\beta$

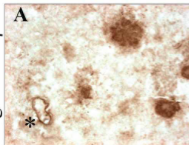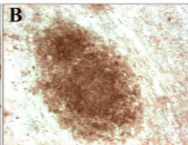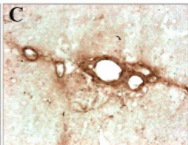

pyroGlu-3 A $\beta$

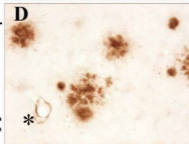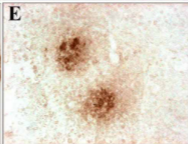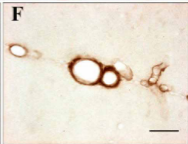

Supplement: mmc5.pdf [file mmc5.pdf]
